# Supplementary material for: Improving function of cytotoxic T‐lymphocytes by transforming growth factor‐β inhibitor in oral squamous cell carcinoma
Source: PubMed Central journal article supplement — Cancer Sci. 2021 Aug 2;112(10):4037–49. doi: 10.1111/cas.15081 (PMC8486191; doi:10.1111/cas.15081), 2021-08-02
Supplement: CAS-112-4037-s002.pdf [file CAS-112-4037-s002.pdf]

**Table S1. Correlation between TGF- $\beta$ 1 density and clinical characteristics.**

|                      | TGF- $\beta$ 1 density |       |       | p     |
|----------------------|------------------------|-------|-------|-------|
|                      | n                      | Mean  | SD    |       |
| Disease presentation |                        |       |       |       |
| Primary cancer       | 20                     | 747.8 | 286.1 | 0.178 |
| Recurrent cancer     | 5                      | 894.0 | 404.5 |       |
| Stage                |                        |       |       |       |
| $\leq$ II            | 23                     | 788.4 | 343.3 | 0.950 |
| $\geq$ III           | 2                      | 792.0 | 87.5  |       |
| PD-L1 expression     |                        |       |       |       |
| < 5%                 | 18                     | 780.8 | 305.5 | 0.790 |
| $\geq$ 5%            | 7                      | 809.1 | 385.9 |       |

Mann-Whitney U test was performed to determine the significance and  $p < 0.05$  was considered statistically significant.
